# Supplementary material
Source: Springer Nature journal article supplement (https://www.springermedizin.de/resource/supplementary/12992_2009_64_MOESM1_ESM.pdf/9616378)

**Cultural Empowerment**

**Relationships & Expectations**

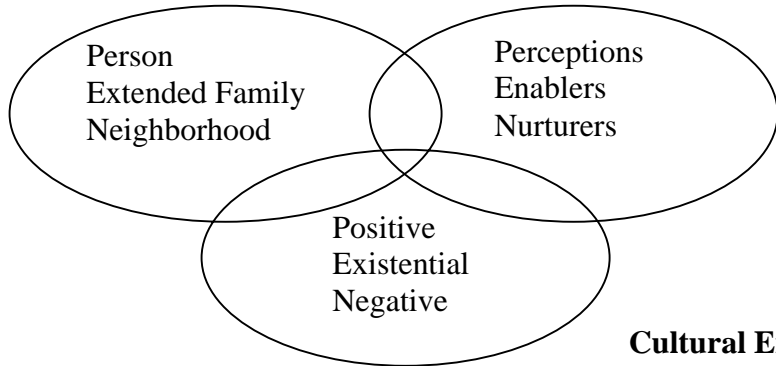

Supplement: MOESM1 [file 9616378]
